# Supplementary material for: High speed e-beam lithography for gold nanoarray fabrication and use in nanotechnology
Source: publisher site journal article supplement (doi:10.3762/bjnano.5.202), 2014-10-30
Supplement: Additional file 1 [file 2190-4286-5-202-S1.pdf]

# Supporting Information

for

## High speed e-beam lithography for gold nanoarray fabrication and use in nanotechnology

Jorge Trasobares\*<sup>1</sup>, François Vaurette\*<sup>1</sup>, Marc François<sup>1</sup>, Hans Romijn<sup>2</sup>, Jean-Louis Codron<sup>1</sup>, Dominique Vuillaume<sup>1</sup>, Didier Théron<sup>1</sup> and Nicolas Clément<sup>1</sup>

Address: <sup>1</sup>Institut d'Electronique Microélectronique et Nanotechnologie (IEMN) CNRS, Avenue Poincaré, 59652, Villeneuve d'Ascq, France and <sup>2</sup>Vistec Lithography BV, De Dintel 27a, 5684 PS Best, The Netherlands

Email: Jorge Trasobares - jorge.trasobares@ed.univ-lille1.fr; François Vaurette - francois.vaurette@iemn.univ-lille1.fr

\* Corresponding author

### Detailed code for the “sequence method”

The sequence is defined as a chain of commands to move the beam and expose pixels. The command "jump" is used to move the beam with a step equals to a multiple of the subfield resolution (e.g., 0.5 nm). The exposure of pixels is done by exposing a line of one pixel with the command "Line".

The sequence covers a subfield (e.g., a square of 4 microns) and is repeated to cover the complete main field.

Here is our commented file for the sequence in order to write a triangular array of dots:

```

! Start of double column 1
Sequence LineClear X 0 RELJMP !Start with LineClear: Clear Memory and write a line of (n+1) pixels (n=0 for a single
pixel).
Sequence Jump 0 a !jump to the next pixel in Y (a: steps of subfield resolution)
Sequence Line X 0 RELJMP !write a pixel
..... !repeated to fill the subfield in Y to expose the first column

Sequence Jump 0 a
Sequence Line X 0 RELJMP
!Top of column 1
Sequence Jump b c ! jump to top of column 2 X and Y in case of a triangular array
(b and c: steps of subfield resolution)
Sequence Line X 0 RELJMP
Sequence Jump 0 -a
..... ! repeated to fill the subfield in Y to expose the first column

Sequence Line X 0 RELJMP
Sequence Jump 0 -a
Sequence Line X 0 RELJMP
!Bottom of column 2
Sequence Jump b -c !jump to bottom of column 3
!Start of double column 3
Sequence Line X 0 RELJMP
..... !columns repeated to fill the subfield in X
Sequence Jump 0 -a
Sequence Line X 0 !last pixel to expose in the subfield
!Bottom of last column
!complete
!Then the sequence is repeated to cover a field (i.e. a square of 500 microns)

```
